# Supplementary material for: A New Triterpenoid from Teucrium viscidum
Source: MDPI journal article supplement (doi:10.3390/molecules18011262), 2013-01-21

## Supporting Information

**Figure S1.** UV spectrum of compound **1** (THF);

**Figure S2.** IR spectrum of compound **1**;

**Figure S3.** HRESIMS spectrum of compound **1**;

**Figure S4.**  $^1\text{H}$ -NMR spectrum of compound **1** (400MHz Pyridine- $d_5$ );

**Figure S5.**  $^{13}\text{C}$ -NMR spectrum of compound **1** (100MHz Pyridine- $d_5$ );

**Figure S6.** DEPT spectrum of compound **1**;

**Figure S7.** HSQC spectrum of compound **1**;

**Figure S8.** HMBC spectrum of compound **1**;

**Figure S9.**  $^1\text{H}$ - $^1\text{H}$ -COSY spectrum of compound **1**;

**Figure S10.** NOESY spectrum of compound **1**.

**Figure S1.** UV spectrum of compound **1** (THF).

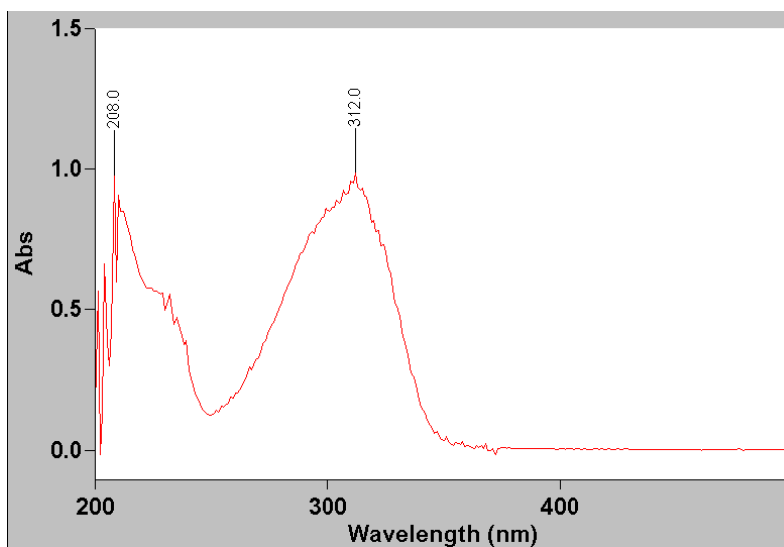

**Figure S2.** IR spectrum of compound **1**.

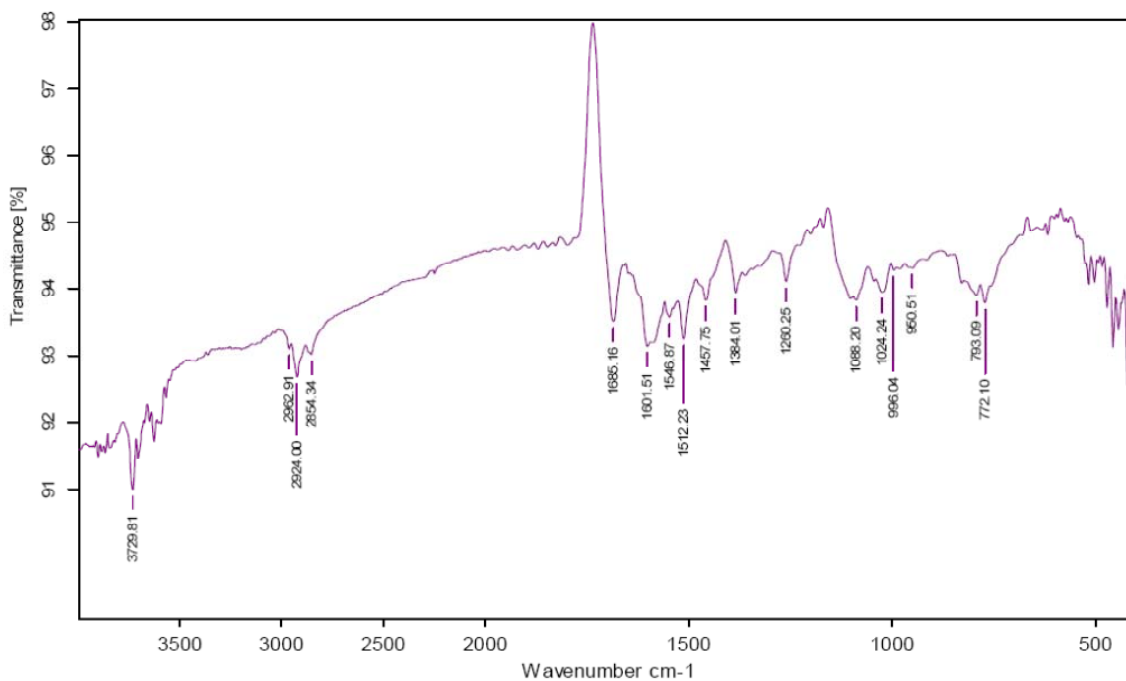

**Figure S3.** HRESIMS spectrum of compound 1.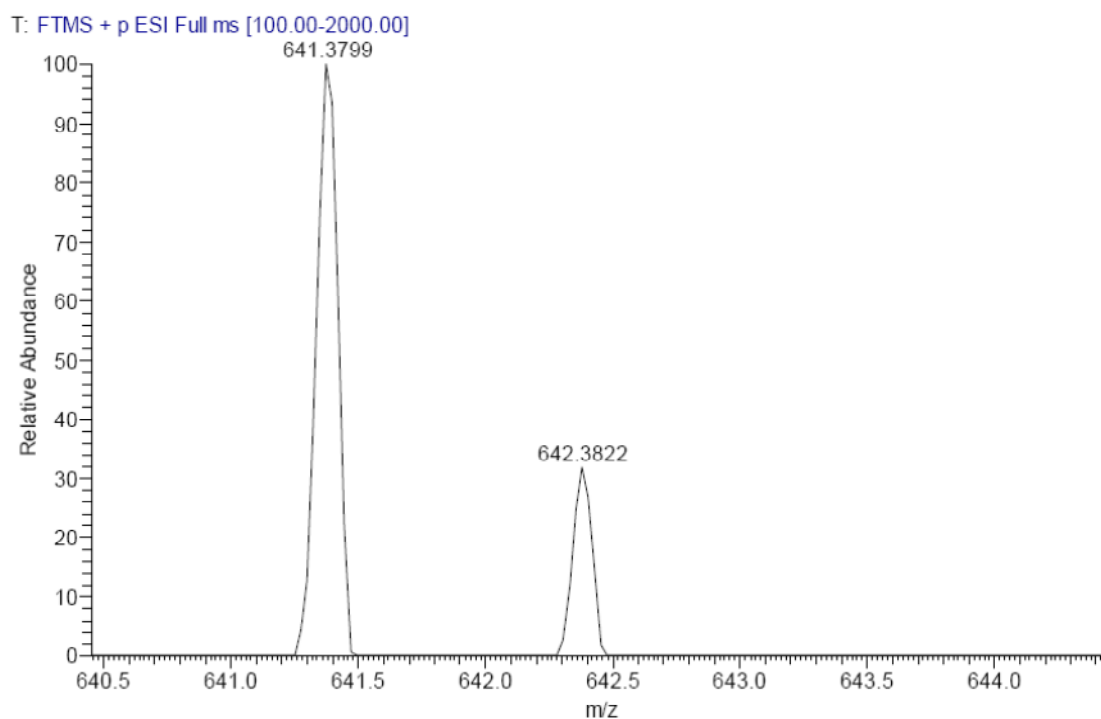**Figure S4.**  $^1\text{H-NMR}$  spectrum of compound 1 (400 MHz Pyridine- $d_5$ ).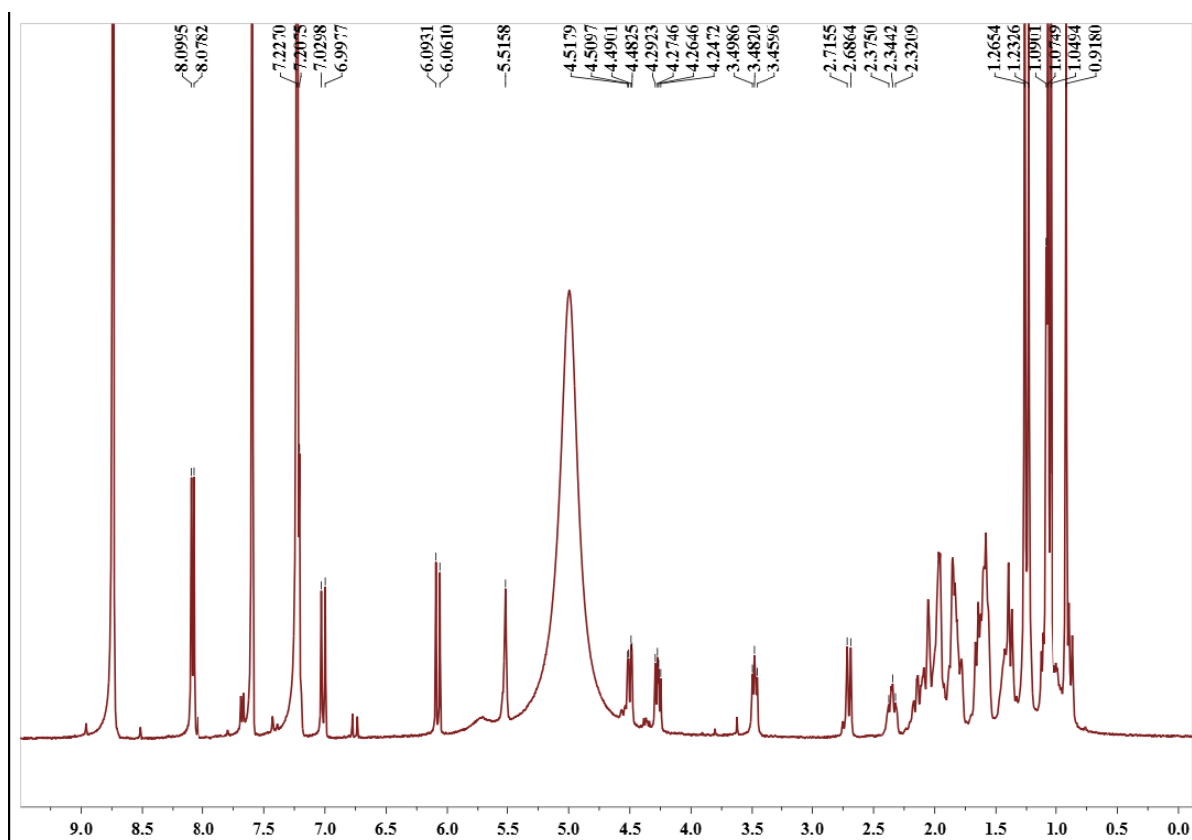

**Figure S5.**  $^{13}\text{C}$ -NMR spectrum of compound **1** (100 MHz Pyridine- $d_5$ ).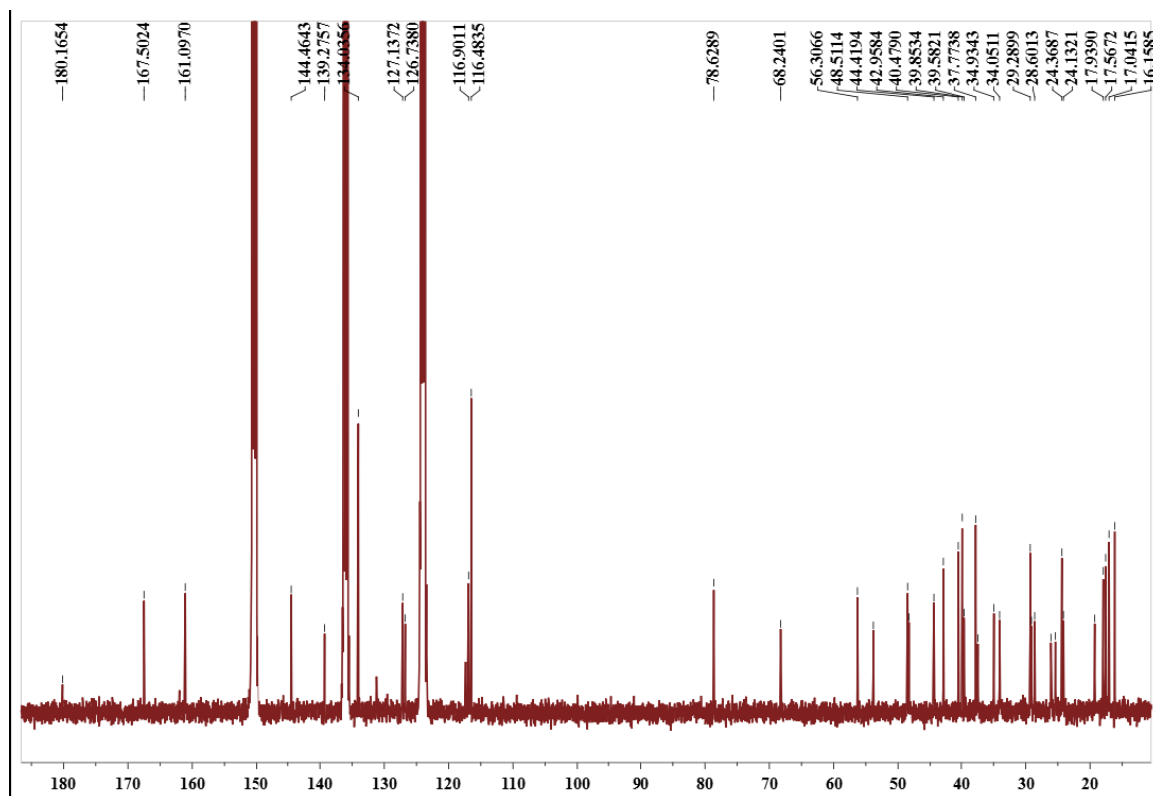**Figure S6.** DEPT spectrum of compound **1**.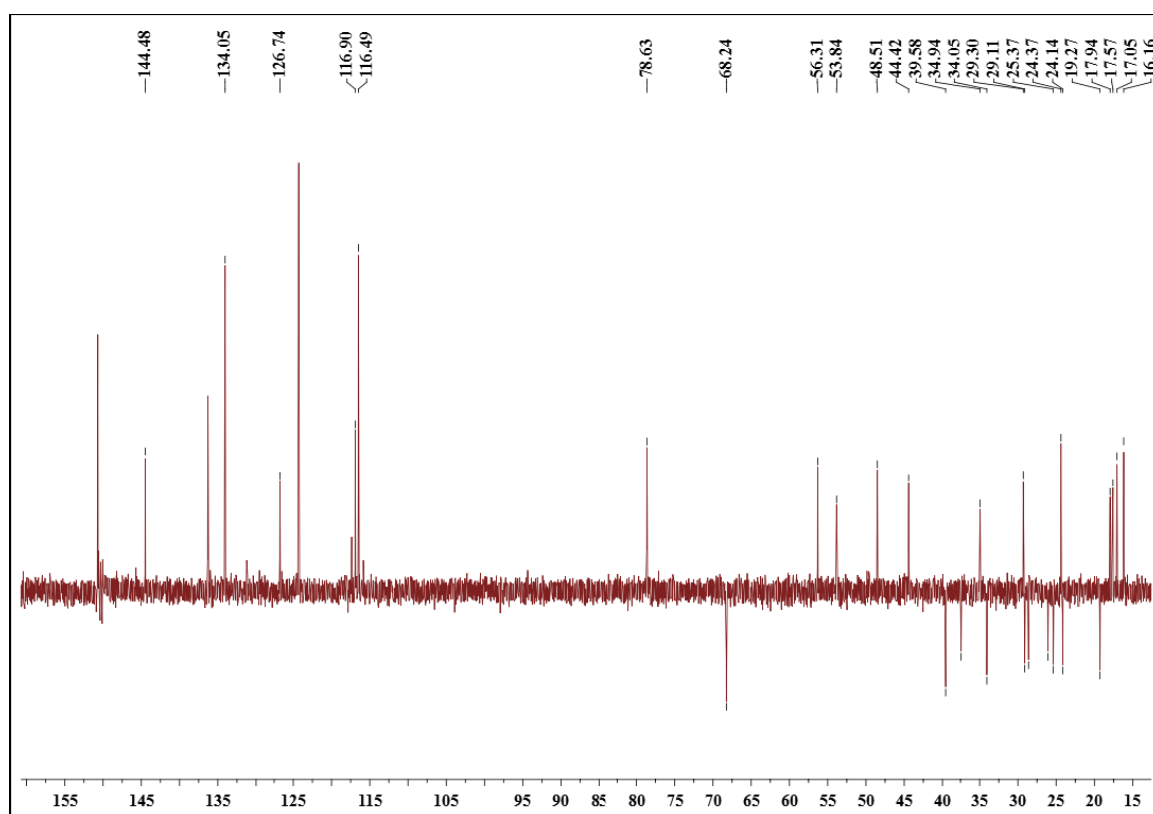

Figure S7. HSQC spectrum of compound 1.

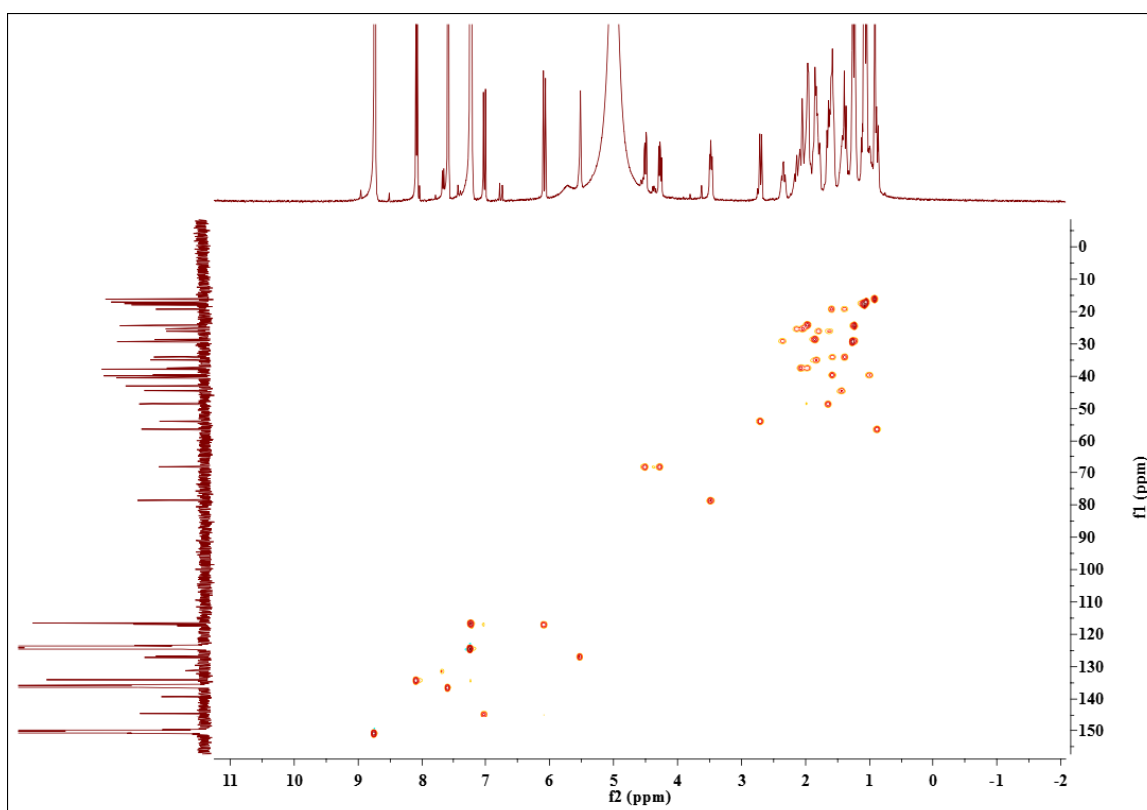

Figure S8. HMBC spectrum of compound 1.

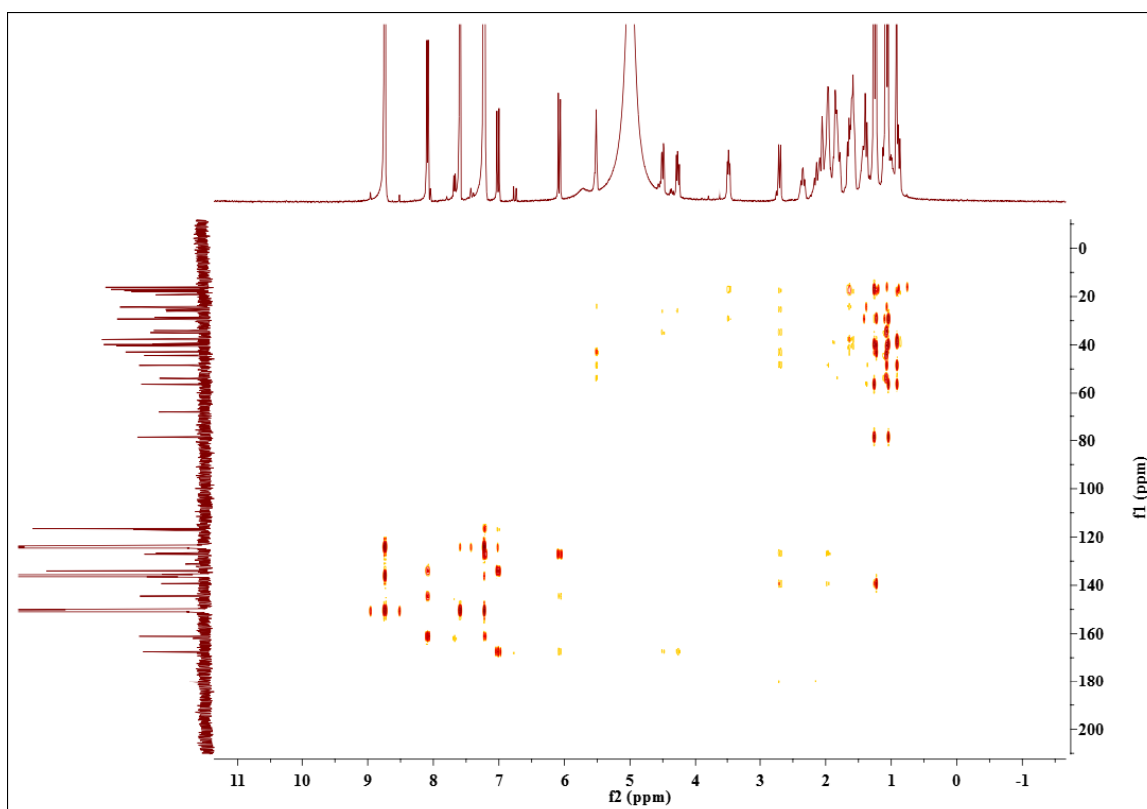

**Figure S9.**  $^1\text{H}$ - $^1\text{H}$  COSY spectrum of compound 1.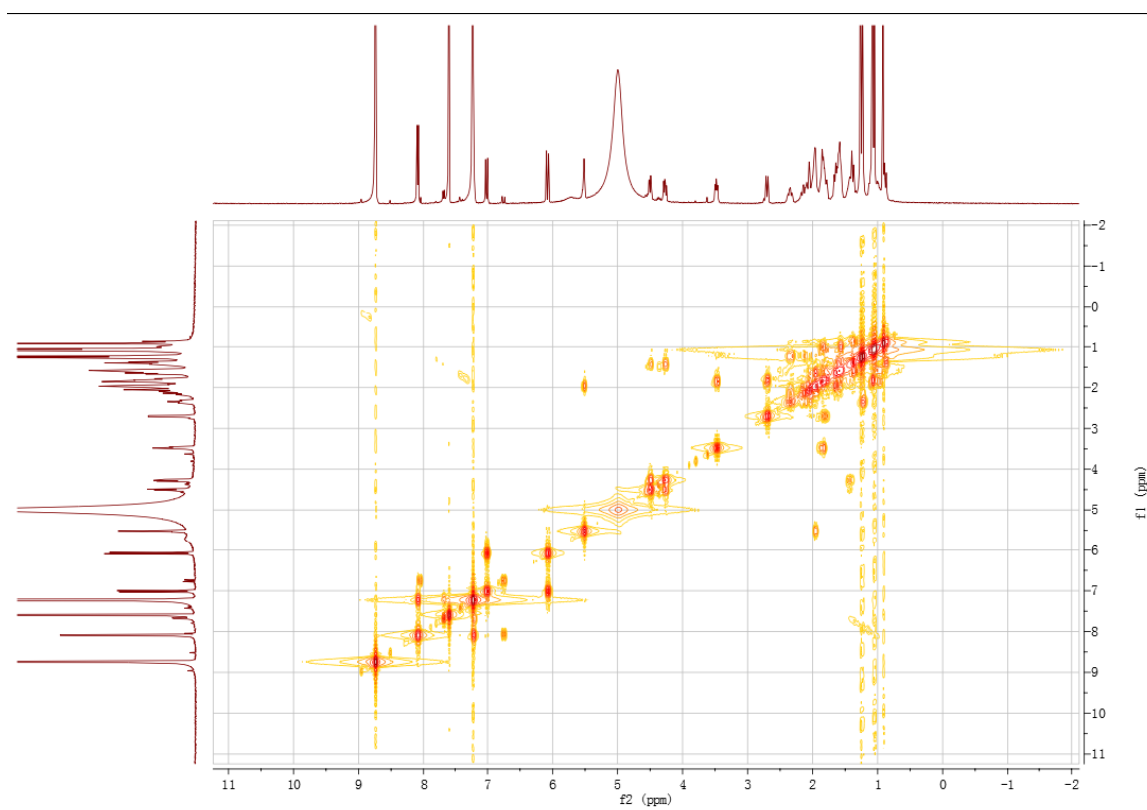**Figure S10.** NOESY spectrum of compound 1.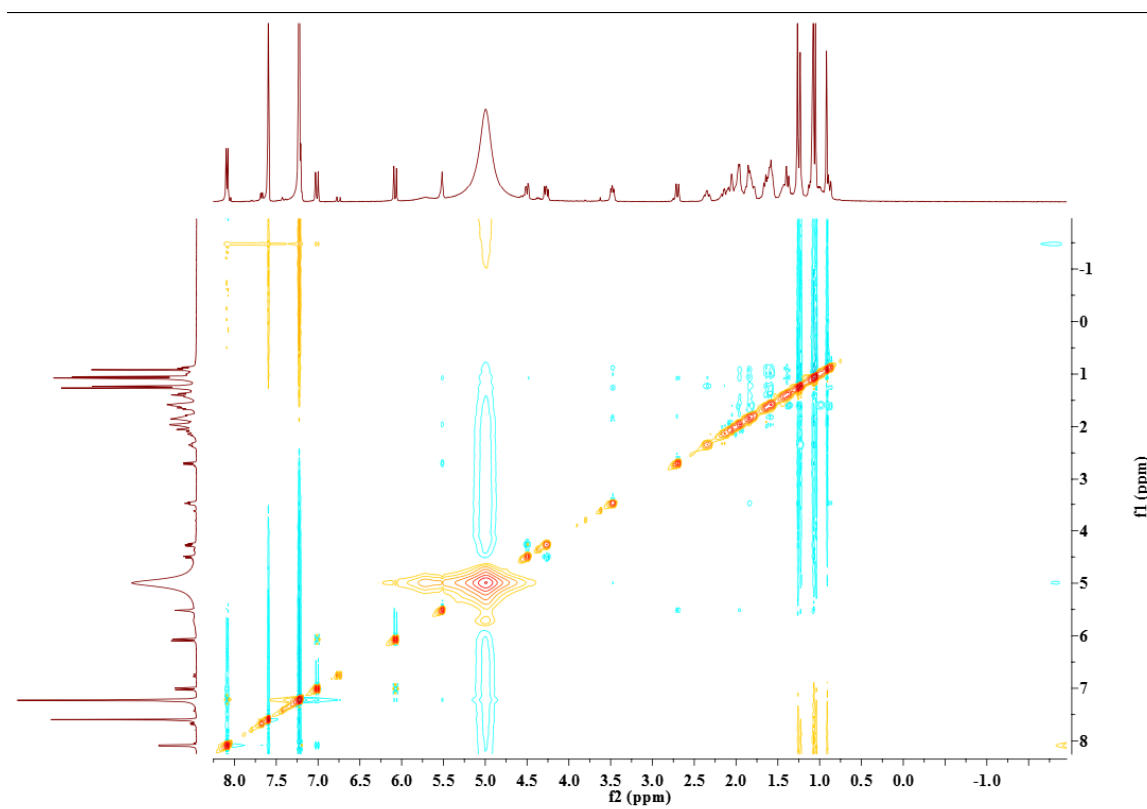

Supplement: s1 [file s1]
